16. Braunstein AH, Oberman HA: Transfusion of plasma components. *Transfusion* 24:281-286, 1984
17. Nilsson L, Hedner U, Nilsson IM, Robertson B: Shelf-life of bank blood and stored plasma with special reference to coagulation factors. *Transfusion* 23:377-381, 1983
18. Harker LA, Malpass TW, Branson HE, Hessel EA II, Slichter SJ: Mechanism of abnormal bleeding in patients undergoing cardiopulmonary bypass: Acquired transient platelet dysfunction associated with selective  $\alpha$ -granule release. *Blood* 56:824-834, 1980
19. Milam JD, Austin SF, Martin RF, Keats AS, Cooley DA: Alteration of coagulation and selected clinical chemistry parameters in patients undergoing open heart surgery without transfusions. *Am J Clin Pathol* 76:155-162, 1981
20. Mammen EF, Koets MH, Washington BC, Wolk LW, Brown JM, Burdick M, Selik NR, Wilson RF: Hemostasis changes during cardiopulmonary bypass surgery. *Semin Thromb Hemost* 11:281-292, 1985
21. Brozovic B, Fleck A, Colley SM, Hollan SR, Krebs H-J, Oberman HO, Schoir JB, van Aken WG, Reesink HW: How much plasma relative to his body weight can a donor give over a certain period of time without a continuous deviation of his plasma protein metabolism in the direction of plasma protein deficiency? *Vox Sang* 47:435-448, 1984
22. Howie MB, Mortimer W, Rathburn S, Myers D, Dumond DA: Does pulsatile flow maintain liver blood flow during cardiopulmonary bypass (abstract)? *ANESTHESIOLOGY* 65:A52, 1986
23. Mathie RT, Desai JB, Taylor KM: The effect of normothermic cardiopulmonary bypass on hepatic blood flow in the dog. *Perfusion* 1: 245-253, 1986
24. Kang YK, Martin DJ, Marquez J, Lewis JH, Bontempo FA, Shaw BW, Starzl TE, Winter PM: Intraoperative changes in blood coagulation and thromboelastographic monitoring in liver transplantation. *Anesth Analg* 64:888-896, 1985
25. Harker LA: Bleeding after cardiopulmonary bypass (editorial). *N Engl J Med* 314:1446-1448, 1986
26. Martin JF, Daniel TD, Trowbridge EA: Acute and chronic changes in platelet volume and count after cardiopulmonary bypass induced thrombocytopenia in man. *Thromb Haemost* 57:55-58, 1987
27. Dechance M, French M, Pages J, French P, Boutzerche H, Bujow PA, McGregor JL: Significant reduction in the binding of a monoclonal antibody (LYP F8) directed against the IIb/IIIa glycoprotein complex in platelets of patients having undergone extracorporeal circulation. *Thromb Haemost* 57:106-109, 1987
28. Barnette RE, Shirk RC, Shepard WR, Rao AK: In-vitro effect of fresh frozen plasma on the ACT in patients undergoing cardiopulmonary bypass (abstract). *ANESTHESIOLOGY* 63:A40, 1985
29. Shanberge JN, Murato M, Quattrociochi-Longe T, Van Neste L: Heparin-protamine complexes in the production of heparin rebound and other complications of extracorporeal bypass procedures. *Am J Clin Pathol* 87:210-217, 1987
30. Doenicke A, Grote B, Lorenz W: Blood and blood substitutes. *Br J Anaesth* 49:681-688, 1977
31. Gerety RJ, Aronson DL: Plasma derivatives and viral hepatitis. *Transfusion* 22:347-351, 1982
32. Ring J, Messmer K: Incidence and severity of anaphylactoid reactions to colloid volume substitutes. *Lancet* i:466-469, 1977
33. Spire B, Dormont D, Barre-Sinoussi F, Montagnier L, Chermann JC: Inactivation of lymphadenopathy-associated virus by heat, gamma rays, and ultraviolet light. *Lancet* i:188-189, 1985
34. Bove JR: Fresh frozen plasma: Too few indications—Too much use (editorial). *Anesth Analg* 64:849-850, 1985
35. Martin DJ, Lucas CE, Ledgerwood AM, Hoschner J, McGonigal MD, Grabow D: Fresh frozen plasma supplement to massive red blood cell transfusion. *Ann Surg* 202:505-511, 1985

Anesthesiology  
69:257-260, 1988

## Rise in Pulmonary Arterial Pressure following Release of Aortic Crossclamp in Abdominal Aneurysmectomy

MOTOSHI KAINUMA, M.D.,\* KIMITOSHI NISHIWAKI, M.D.,† YASUHIRO SHIMADA, M.D.‡

Many reports<sup>1-6</sup> have described the hemodynamic effects of aortic cross-clamping (XC) and declamping (XD) during surgery for abdominal aortic aneurysms

(AAA). Although systemic arterial hypotension following XD is well established, reports of changes in pulmonary arterial pressure are not well documented. During routine monitoring of patients during AAA surgery, we noted a transient rise in pulmonary arterial pressure (PAP) following XD. We, therefore, prospectively evaluated changes in pulmonary arterial pressure after XD in patients undergoing AAA surgery.

### MATERIALS AND METHODS

Eighteen consecutive patients (NYHA Class I or II) undergoing elective surgical treatment of infrarenal AAA were selected for study after institutional approval and informed consent were obtained. Five patients were excluded from the results (*vide infra*). The

\* Assistant Professor of Anesthesiology.

† Staff of Anesthesiology.

‡ Professor and Chairman of Anesthesiology.

Received from the Department of Anesthesiology, Nagoya University School of Medicine, Tsurumai-cho, Showa-ku, Nagoya 466, Japan. Accepted for publication March 1, 1988.

Address reprint requests to Dr. Kainuma: Assistant Professor, Department of Anesthesiology, Nagoya University School of Medicine, 65 Tsurumai-cho, Showa-ku, Nagoya 466, Japan.

Key words: Lung; pulmonary hypertension. Monitoring: end-expiratory carbon dioxide; mixed venous oxygen saturation; pulmonary arterial pressure. Surgery: aortic aneurysmectomy; aortic cross-clamping; aortic declamping.

average age of the remaining 13 patients was 60.7 yr (range 59–70 yr), height 163 cm (range 157–172 cm), and weight 55 kg (range 49–68 kg); 11 patients were men. The patients had no history of angina pectoris, myocardial infarction, valvular heart disease, or arterial hypertension (diastolic > 105 mmHg). All had regular sinus rhythm and no significant abnormalities in preoperative ECG, except for eight patients who showed non-specific ST-T changes. Preoperative pulmonary function tests were within the normal range, except for three patients whose 1-s forced expired volume was less than 70%. Chest roentgenograms showed no significant abnormalities.

The patients were premedicated with intramuscular atropine 0.5 mg and hydroxyzine 50 mg 30 min prior to anesthesia. Anesthesia was induced with thiamylal 5 mg/kg iv and tracheal intubation was facilitated by administration of succinylcholine 1 mg/kg iv. An arterial cannula was inserted into the radial artery to measure systemic arterial blood pressure. A 7F thermodilution flow-directed pulmonary artery catheter (American Edwards Laboratory, Santa Ana, CA) was introduced *via* the right internal jugular vein for measurements of central venous blood pressure (CVP), PAP, pulmonary arterial wedge pressure (PAWP), and cardiac output in nine patients. In four patients, mixed venous oxygen saturation was continuously measured with an oximeter incorporated into a thermodilution flow-directed pulmonary artery catheter (American Edwards Laboratory, Santa Ana, CA). Expired carbon dioxide concentration at the proximal end of the endotracheal tube was monitored with an infrared carbon dioxide analyzer (Datex CD-300, Helsinki, Finland) in the same four patients. Nitrous oxide with 40–50% oxygen and enflurane (1–2%) were used for maintenance of anesthesia, supplemented with pancuronium bromide for muscle relaxation. Intraoperative maintenance fluid consisted of lactated Ringer's solution given at a rate of 300–350 ml/h. Trimethaphan,  $15\text{--}30\text{ }\mu\text{g}\cdot\text{kg}^{-1}\cdot\text{min}^{-1}$ , was administered just prior to XC to alleviate an abrupt increase in afterload. This dose was tailored to accommodate systemic arterial pressure fluctuations, and the duration of infusion was approximately 2 min, although it varied among cases. Blood and plasma transfusions were titrated to replace blood loss during reconstruction of the abdominal aorta with a bifurcation graft. Just prior to aortic declamping, 150 ml of lactated Ringer's solution was infused in addition to the maintenance fluid volume. Aortic declamping was performed in a stepwise manner over a duration of 30 s, starting from the right iliac artery to the left iliac artery. The anesthetic concentrations were kept constant in each case during the study. Five cases were excluded from the study because they needed more than 200 ml of blood

and/or plasma transfusion within 10 min immediately after XD to replace blood loss. The mean aortic cross-clamp time was 42.1 min (range 32–79 min). The mean blood loss during surgery was 536 ml (range 230–880 ml).

Hemodynamic measurements were performed at the following intervals: prior to XC, 30 s post-XC, 5 min post-XC, prior to XD, 30 s post-XD, 2 min post-XD, 5 min post-XD, and 10 min post-XD. Measurements prior to XC were performed before the start of trimethaphan infusion, and those prior to XD were performed before the additional infusion of 150 ml of lactated Ringer's solution. In all patients, heart rate (HR); systolic, diastolic, and mean arterial blood pressures (MAP); systolic, diastolic, and mean pulmonary arterial blood pressures (MPAP); and CVP were continuously monitored using a Hewlett-Packard® system 78342A or 78171A (McMinnville, OR). Thermodilution cardiac outputs were measured in duplicate with a cardiac output computer (9520A, American Edwards Laboratory, Santa Ana, CA). Hemodynamic indices were calculated from measured variables using standard formulae.<sup>7</sup>

Data were expressed as mean  $\pm$  SEM. Statistical analysis included analysis of variance for repeated measurements on each parameter. Obtained data were compared with the control (pre-cross-clamping) value using Dunnett's method. *P* values less than 0.05 were considered significant.

## RESULTS

MAP decreased significantly to  $80 \pm 4$  mmHg at 30 s post-XD, compared with the pre-XC values of  $97 \pm 5$  mmHg, while no significant increase was observed after XC. MPAP increased significantly to  $16.4 \pm 1.2$  and  $17.5 \pm 0.6$  mmHg at 2 and 5 min post-XD, respectively, compared with pre-XC values of  $12.4 \pm 1.0$  mmHg. PAWP, CVP, and HR did not show a significant change (fig. 1). Cardiac index (CI) decreased significantly from  $2.58 \pm 0.08$  to  $1.77 \pm 0.12$  l/min/m at 30 s post-XC, and SVRI increased significantly from  $2835 \pm 190$  to  $5114 \pm 1687$  dynes $\cdot\text{sec}\cdot\text{m}^2/\text{cm}^5$  at 30 s post-XC and to  $4206 \pm 370$  dynes $\cdot\text{sec}\cdot\text{m}^2/\text{cm}^5$  at 2 min post-XC. However, PVRI did not change significantly, although it tended to increase at 2 and 5 min post-XD (fig. 2). LVSWI did not show a significant change, while RVSWI increased significantly to  $4.8 \pm 0.7$  and  $5.2 \pm 0.8$  gm/m<sup>2</sup> at 2 and 5 min post-XD, respectively, compared with pre-XC values of  $2.7 \pm 0.4$  gm/m (fig. 3).

Mixed venous oxygen saturation measured continuously in four cases decreased rapidly to 53–71% immediately after XD. In these cases, increases in carbon dioxide concentration (6.6–7.5%) in end-expiratory gas

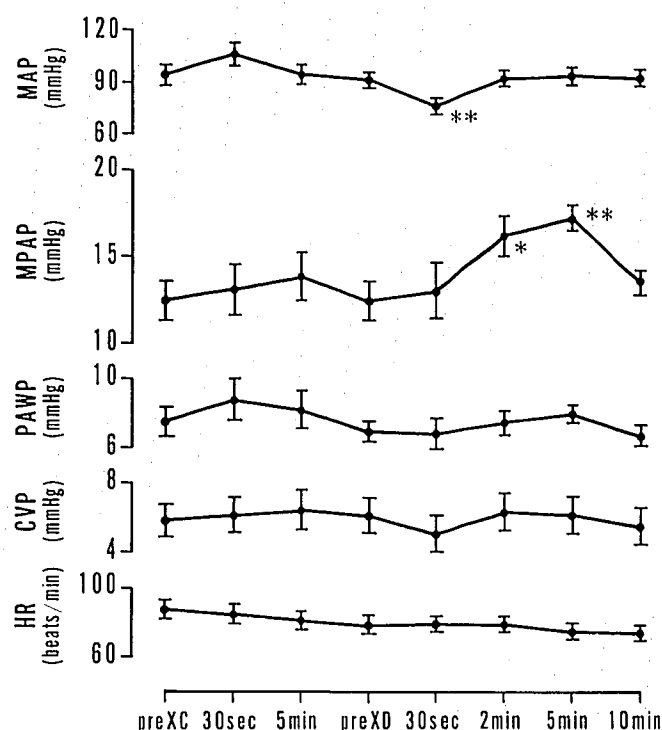

FIG. 1. Hemodynamic measurements in 13 patients. MAP = mean arterial pressure; MPAP = mean pulmonary arterial pressure; PAWP = pulmonary arterial wedge pressure; CVP = central venous pressure; HR = heart rate; preXC = pre-cross-clamping time; preXD = pre-declamping time. Values are means  $\pm$  SEM,  $n = 13$ . Statistical analysis by analysis of variance and Dunnet's multiple comparison test. \*  $P < 0.05$ , \*\*  $0.01 < P < 0.05$ , compared with pre-XC values.

samples were also observed following XD. Recordings of PAP elevation, decreased mixed venous oxygen saturation, and increased end-expiratory carbon dioxide concentration after XD are shown in figure 4.

## DISCUSSION

An interesting aspect of the present study was significant increases in MPAP at 2 and 5 min post-XD in patients with AAA. Although there has been mention of systemic hemodynamic changes following XC and XD,<sup>1-6</sup> reports of detailed measurements of pulmonary hemodynamic changes on XD have been rare. Silverstein *et al.*<sup>2</sup> measured MPAP after XD. They reported that it decreased by 20% of the pre-XD value within 1-3 min after XD, which, however, was not significant compared to that of the pre-XD value. There are several possibilities as to why their data is different from ours. Firstly, Silverstein *et al.* had not described the number of patients who had AAA and atherosclerotic occlusive disease, respectively. Periaortic collateral vessels are reportedly different between the two diseases.<sup>8</sup> If the metabolic effects distal to XC are one of the causes of the increase in MPAP, responses of pulmo-

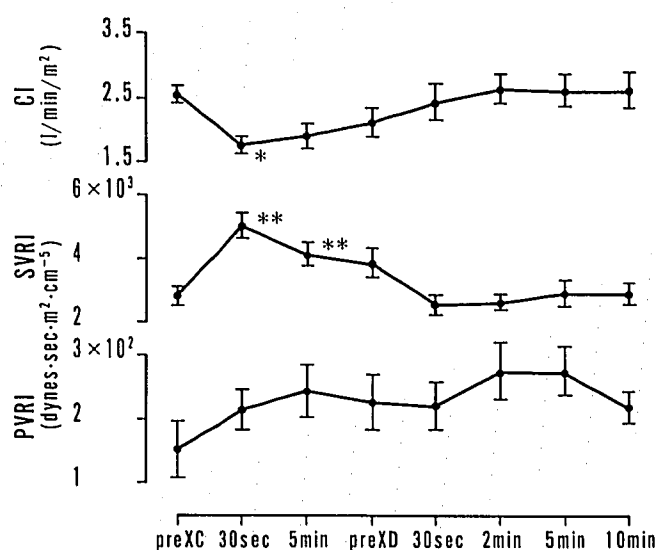

FIG. 2. Hemodynamic measurements in 13 patients. CI = cardiac index; SVRI and PVRI = systemic and pulmonary vascular resistance indices; preXC = pre-cross-clamping time; preXD = pre-declamping time. Values are means  $\pm$  SEM,  $n = 13$ . Statistical analysis by analysis of variance and Dunnet's multiple comparison test. \*  $P < 0.05$ , \*\*  $0.01 < P < 0.05$ , compared with pre-XC values.

nary vasculature to XD in patients with AAA would be more exaggerated compared to that of atherosclerotic occlusive disease. Secondly, the period just after XD is important, since PAP had increased significantly during this period in our cases. Thus, their measurement time of 1-3 min after XD is vague compared with our results. Thirdly, their control values were different from ours. We measured pre-XD values prior to an additional infusion of lactated Ringer's solution in order to minimize the influence of volume loading on our re-

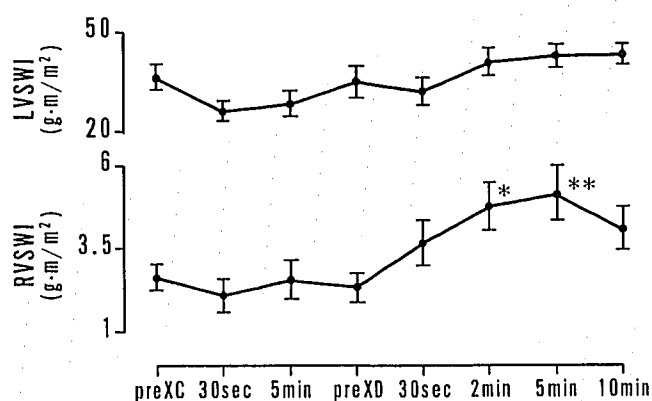

FIG. 3. Hemodynamic measurements in 13 patients. LVSWI = left ventricular stroke work index; RVSWI = right ventricular stroke work index; preXC = pre-cross-clamping time; preXD = pre-declamping time. Values are means  $\pm$  SEM,  $n = 13$ . Statistical analysis by analysis of variance and Dunnet's multiple comparison test. \*  $P < 0.05$ , \*\*  $0.01 < P < 0.05$ , compared with pre-XC values.

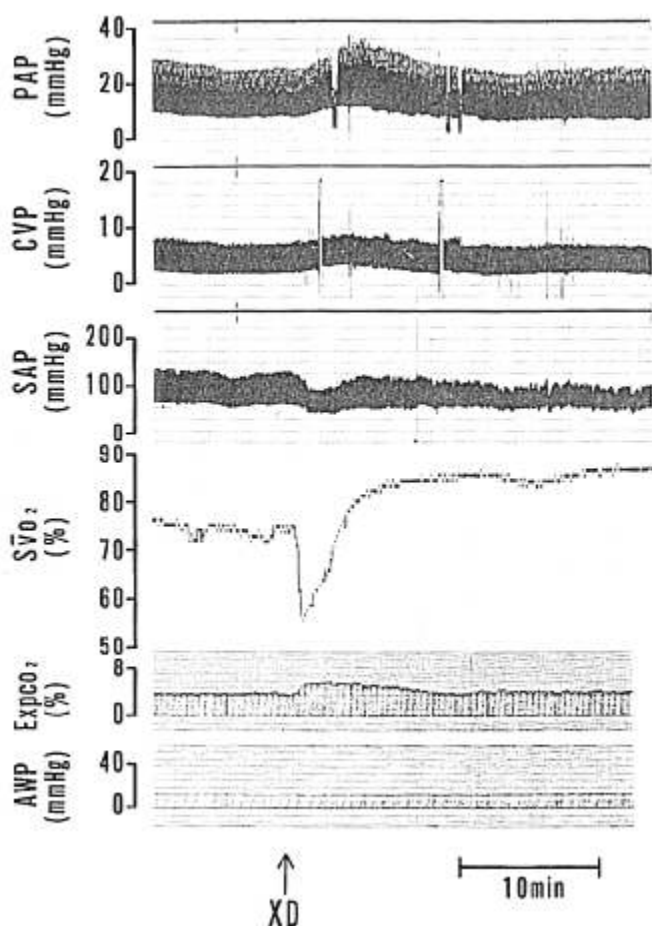

FIG. 4. Recordings showing alterations in pulmonary arterial pressure, central venous pressure, systemic arterial pressure, mixed venous oxygen saturation, and end-expiratory carbon dioxide concentration in pre- and post-aortic declamping period. SAP = systemic arterial blood pressure; PAP = pulmonary arterial blood pressure; CVP = central venous blood pressure; XD = aortic declamping.  $\text{S}\bar{\text{V}}\text{O}_2$  = mixed venous oxygen saturation;  $\text{ExpCO}_2$  = expiratory carbon dioxide concentration; AWP = airway pressure.

sults. Assuming that they had obtained pre-XD values after an additional volume load, pre-XD PAP would be relatively high, and would be declining immediately after XD.

Decreased mixed venous oxygen saturation after XD could reflect a return of hypoxic venous blood from the lower extremities and/or an increase in oxygen extraction to compensate for the oxygen debt occurring during the XC period.<sup>4-6</sup> Since hypoxic pulmonary vasoconstriction is reportedly evoked by a synergistic effect of decreased alveolar oxygen tension and mixed venous oxygen tension,<sup>9-11</sup> hypoxic mixed venous blood might temporarily cause pulmonary vasoconstriction. Damask *et al.*<sup>5</sup> reported that increased  $\text{PaCO}_2$  coincides with higher carbon dioxide production after XD. In a recent report, it was noted that acute hypercapnea exerts a moderate degree of pulmonary vasoconstriction and

enhances hypoxic pulmonary vasoconstriction, although this depends upon experimental circumstances and the species chosen for the study.<sup>12-14</sup> Therefore, results presented in figure 4 might explain our present observation of an increase in MPAP after XD. However, the absence of a significant increase in PVR after XD in our patients contradicts this speculation.

In conclusion, we report a significant increase in MPAP 2 and 5 min after XD in patients undergoing AAA surgery. The mechanism of this phenomenon remains to be investigated further.

#### REFERENCES

1. Meloche R, Pottecher T, Audet J, Dufresne O, LePage C: Hemodynamic changes due to clamping of the abdominal aorta. *Can Anaesth Soc J* 24:20-34, 1977
2. Silverstein PR, Caldera DL, Cullen DJ, Davison JK, Darling C, Emerson CW: Avoiding the hemodynamic consequences of aortic cross-clamping and unclamping. *ANESTHESIOLOGY* 50:462-466, 1979
3. Reiz S, Peter T, Rais O: Hemodynamic and cardiometabolic effects of infrarenal aortic and common iliac artery declamping in man—An approach to optimal volume loading. *Acta Anaesthesiol Scand* 23:579-586, 1979
4. Falk JL, Rackow EC, Blumenberg R, Gelfand M, Fein IA: Hemodynamic and metabolic effects of abdominal aortic cross-clamping. *Am J Surg* 142:174-177, 1981
5. Damask MC, Weissman C, Rodriguez J, Askanazi J, Rosenbaum SH, Hyman AI: Abdominal aortic cross-clamping. Metabolic and hemodynamic consequences. *Arch Surg* 119:1332-1337, 1984
6. Eklof B, Neglen P, Thomson D: Temporary incomplete ischemia of the legs induced by aortic clamping in man. Effects on central hemodynamics and skeletal muscle metabolism by adrenergic block. *Ann Surg* 193:89-98, 1980
7. Kaplan JA: Hemodynamic monitoring, *Cardiac Anesthesia*, 2nd edition. Edited by Kaplan JA. Orland, Grune & Stratton, Inc, 1987, pp 179-225
8. Johnstone WJ, Balestrieri FJ, Plonk G, D'Souza V, Howard G: The influence of periaortic collateral vessels on the intraoperative hemodynamic effects of acute aortic occlusion in patients with aorto-occlusive disease or abdominal aortic aneurysm. *ANESTHESIOLOGY* 66:386-389, 1987
9. Benumof JL, Pirlo AF, Johanson I, Trousdale FR: Interaction of  $\text{P}\bar{\text{V}}\text{O}_2$  with  $\text{PaO}_2$  on hypoxic pulmonary vasoconstriction. *J Appl Physiol* 51:871-874, 1981
10. Marshall C, Marshall B: Site and sensitivity for stimulation of hypoxic pulmonary vasoconstriction. *J Appl Physiol* 55:711-716, 1983
11. Domino KB, Weinstein L, Glasser SA, Lindgren L, Marshall C, Harken A, Marshall BE: Influence of mixed venous oxygen tension ( $\text{P}\bar{\text{V}}\text{O}_2$ ) on blood flow to atelectatic lung. *ANESTHESIOLOGY* 59:428-434, 1983
12. Barer GR, Howard P, Shaw JW: Stimulus-response curves for the pulmonary vascular bed to hypoxia and hypercapnea. *J Physiol (Lond)* 211:139-155, 1970
13. Barer GR, Shaw JW: Pulmonary vasodilator and vasoconstrictor actions of carbon dioxide. *J Physiol (Lond)* 213:633-645, 1971
14. Bindeslev L, Jolin-Carlsson A, Santesson J, Gottlieb I: Hypoxic pulmonary vasoconstriction in man: Effects of hyperventilation. *Acta Anaesthesiol Scand* 29:547-551, 1985
